# Supplementary material for: Synthesis, crystal structures and magnetic behaviour of dimeric and tetrameric gadolinium carboxylates with trichloroacetic acid
Source: Royal Society of Chemistry journal article supplement (doi:10.1039/b600368k), 2006-01-01
Supplement: b600368k.pdf [file b600368k.pdf]

**Table S1** Selected interatomic distances  $d$  /pm for $(\text{CH}_3\text{NH}_3)_2[\text{Gd}_2(\text{CCl}_3\text{COO})_6(\text{H}_2\text{O})_6](\text{CCl}_3\text{COO})_2 \cdot 2\text{CCl}_3\text{COOH}$  (**1**) and $(\text{NH}_3\text{CH}_3)_2[\text{Gd}_4(\text{OH})_4(\text{CCl}_3\text{COO})_{10}(\text{H}_2\text{O})_6] \cdot 2\text{H}_2\text{O}$  (**2**)

|     | (1)                | $d$ /pm  | (2) | $d$ /pm            |           |
|-----|--------------------|----------|-----|--------------------|-----------|
| Gd1 | -O11               | 238.4(4) | Gd1 | -O1                | 239.3(8)  |
|     | -O12 <sup>a)</sup> | 237.1(4) |     | -O2                | 238.8(9)  |
|     | -O21               | 239.5(5) |     | -O4                | 237.1(8)  |
|     | -O21 <sup>a)</sup> | 290.9(4) |     | -O01               | 238.9(8)  |
|     | -O22 <sup>a)</sup> | 247.5(4) |     | -O12               | 240.7(12) |
|     | -O31               | 233.2(4) |     | -O41               | 244.8(11) |
|     | -O1W               | 243.3(4) |     | -O71               | 234.7(9)  |
|     | -O2W               | 239.4(4) |     | -O1W               | 246.9(10) |
|     | -O3W               | 248.2(5) | Gd2 | -O2                | 244.2(8)  |
|     | -Gd1 <sup>a)</sup> | 420.2(3) |     | -O3                | 236.2(9)  |
| N1  | -O22 <sup>b)</sup> | 294.4(3) |     | -O4                | 237.6(9)  |
|     | -O41 <sup>c)</sup> | 295.3(3) |     | -O42               | 234.9(11) |
|     | -O42 <sup>d)</sup> | 280.6(1) |     | -O81               | 232.9(13) |
|     | -O51 <sup>e)</sup> | 307.8(3) |     | -O3W               | 244.8(10) |
|     | -O2W <sup>c)</sup> | 311.2(2) |     | -O4W               | 241.7(11) |
| C11 | -O11               | 124.1(7) |     | -O6W               | 242.5(12) |
|     | -O12               | 123.6(7) | Gd3 | -O1                | 239.2(9)  |
| C21 | -O21               | 123.9(8) |     | -O2                | 241.8(8)  |
|     | -O22               | 124.0(7) |     | -O3                | 242.9(8)  |
| C31 | -O31               | 123.8(7) |     | -O02               | 250.3(10) |
|     | -O32               | 122.3(7) |     | -O21               | 243.4(11) |
| C41 | -O41               | 122.0(9) |     | -O62               | 251.4(10) |
|     | -O42               | 124.9(9) |     | -O82               | 241.6(13) |
| C51 | -O51               | 118.9(8) |     | -O91               | 239.7(10) |
|     | -O52               | 129.3(9) |     | -O2W               | 249.7(8)  |
|     |                    |          | Gd4 | -O1                | 240.1(8)  |
|     |                    |          |     | -O3                | 238.7(9)  |
|     |                    |          |     | -O4                | 239.4(9)  |
|     |                    |          |     | -O11               | 236.0(11) |
|     |                    |          |     | -O31               | 233.3(10) |
|     |                    |          |     | -O51               | 232.3(9)  |
|     |                    |          |     | -O61               | 240.9(9)  |
|     |                    |          |     | -O5W               | 249.5(13) |
|     |                    |          | Gd1 | -Gd2               | 382.6(1)  |
|     |                    |          |     | -Gd3               | 387.3(1)  |
|     |                    |          |     | -Gd4               | 382.2(1)  |
|     |                    |          | Gd2 | -Gd3               | 385.3(1)  |
|     |                    |          |     | -Gd4               | 380.3(1)  |
|     |                    |          | Gd3 | -Gd4               | 388.0(1)  |
|     |                    |          | N1  | -O22 <sup>e)</sup> | 280.3(2)  |
|     |                    |          |     | -O72               | 279.4(3)  |
|     |                    |          |     | -O7W               | 284.0(3)  |
|     |                    |          | N2  | -O02               | 289.2(3)  |
|     |                    |          |     | -O62               | 282.3(3)  |
|     |                    |          |     | -O2W               | 284.2(3)  |

Symmetry transformations used to generate atoms:

<sup>a)</sup>-x,-y,-z+1; <sup>b)</sup>-x,-y+1,-z+1; <sup>c)</sup>x,y+1,z; <sup>d)</sup>-x+1,-y+1,-z; <sup>e)</sup>-x+1,-y+2,-z

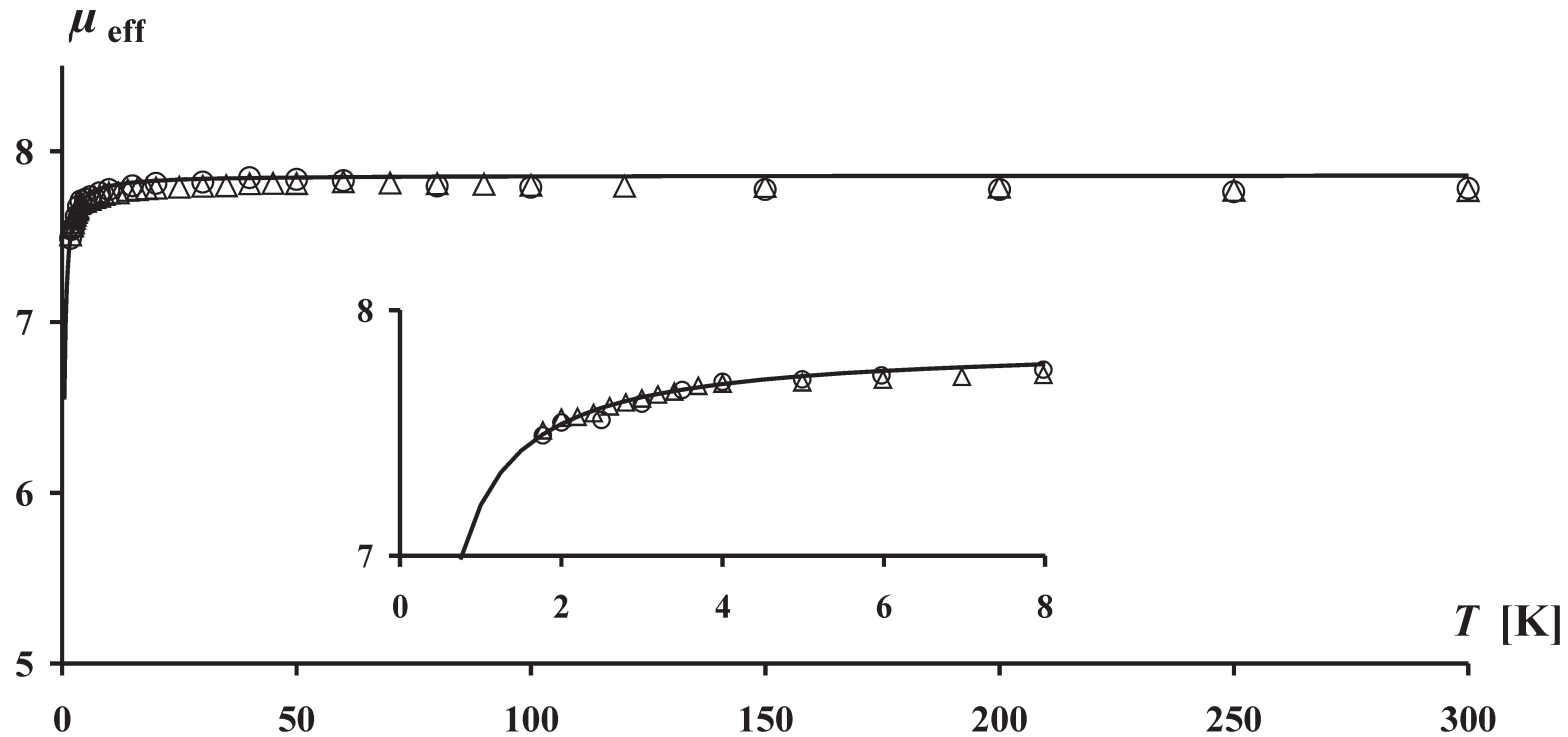

**Fig. S1** Comparison of measured ( $\circ$ ,  $H^{(\text{in})}$ :500 Oe;  $\Delta$ ,  $H^{(\text{in})}$ :1000 Oe) and calculated (—) effective Bohr magneton numbers for 1.

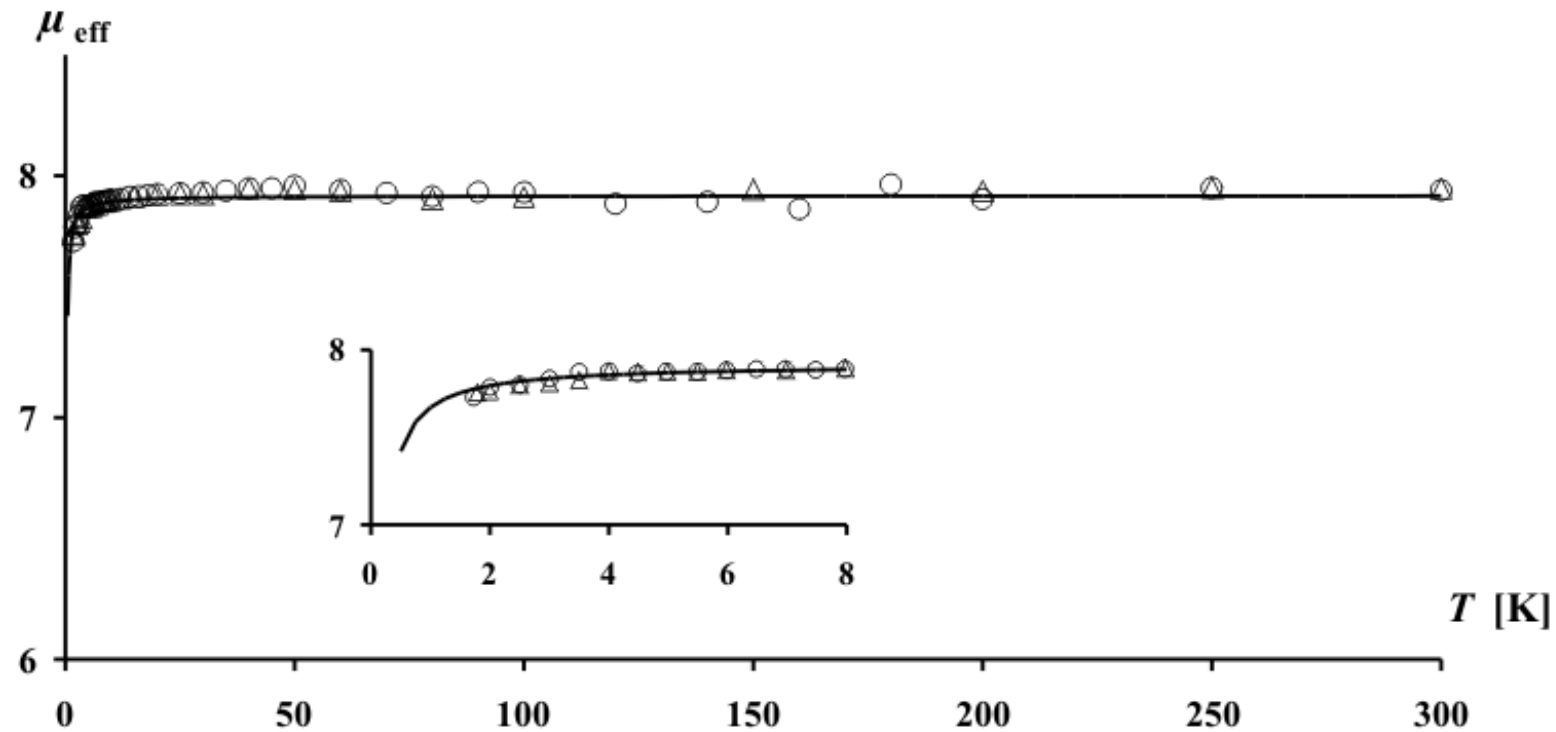

Fig. S2 Comparison of measured ( $\circ$ ,  $H^{(\text{ir})}$ :500 Oe;  $\Delta$ ,  $H^{(\text{ir})}$ :1000 Oe) and calculated ( $\text{—}$ ) effective Bohr magneton numbers for 3.
